# Supplementary material for: Extracting stability increases the SNP heritability of emotional problems in young people
Source: PubMed Central journal article supplement (PMC6193004; doi:10.1038/s41398-018-0269-5), 2018-10-17
Supplement: 41398_2018_269_MOESM1_ESM.pdf [file 41398_2018_269_MOESM1_ESM.pdf]

## Table of Contents

|                                                                                                                                                                                 |    |
|---------------------------------------------------------------------------------------------------------------------------------------------------------------------------------|----|
| Table 1: Literature review: SNP heritability of child and adolescent emotional problems .....                                                                                   | 2  |
| Table 2: Descriptive statistics for the 12 TEDS anxiety and depression scales .....                                                                                             | 3  |
| Figure 1: Histograms of TEDS anxiety and depression scales .....                                                                                                                | 4  |
| Figure 2: Phenotypic correlations of the 12 anxiety and depression scales at ages 7, 12 and 16 .....                                                                            | 5  |
| Figure 3: histograms of CFA- (left) and IRT-derived (right) stable emotional problems scores                                                                                    | 6  |
| CFA model fit and factor loadings .....                                                                                                                                         | 7  |
| Full genotyping information.....                                                                                                                                                | 9  |
| SNP heritability: supplementary methods .....                                                                                                                                   | 10 |
| Table 7: Full twin and SNP heritability results: .....                                                                                                                          | 11 |
| Figure 4: Twin and SNP heritability results for a simple mean approach to aggregating emotional problems measures, with sensitivity analyses to investigate rater effects ..... | 12 |
| Investigation of the contribution of individuals with persistent emotional problems to the increased heritability of our stable phenotype.....                                  | 14 |
| Figures 5 and 6: Polygenic score results .....                                                                                                                                  | 15 |
| Table 8: variance explained by polygenic scores for MDD, derived from summary statistics for a subset of 10,000 variants in the PGC sample including 23&Me. ....                | 16 |
| Figures 7 and 8: Genome-wide association results .....                                                                                                                          | 17 |
| Table 9: Genetic correlations between stable emotional problems (from CFA) and psychiatric traits, obtained using LD Score regression.....                                      | 18 |
| Full authors list: Major Depressive Disorder Working Group of the Psychiatric Genomics Consortium .....                                                                         | 19 |
| LD Hub acknowledgements.....                                                                                                                                                    | 25 |

Table 1: Literature review: SNP heritability of child and adolescent emotional problems

| Reference     | Year   | Trait               | Sample      | Measure                                       | Age | Reporter          | N    | SNP heritability | SE  | P value |
|---------------|--------|---------------------|-------------|-----------------------------------------------|-----|-------------------|------|------------------|-----|---------|
| Benke et al.  | 2014   | Emotional problems  | Gen R       | CBCL 1.5-5 internalising scale                | 3   | Primary caregiver | 2037 | 0.26             | NA  | 0.07    |
|               |        |                     | NTR         | CBCL 2-3 internalising scale                  | 3   | Mother            | 1475 | 0.18             | NA  | 0.3     |
|               |        |                     | Raine       | CBCL 2-3 internalising scale                  | 2   | Primary caregiver | 1084 | 0.13             | NA  | 0.33    |
| Pappa et al.  | 2015   | Emotional problems  | NTR / Gen R | CBCL internalising                            | 7   | Parent            | 3175 | 0.12             | 0.1 |         |
| Sallis et al. | 2017   | Depressive Symptoms | ALSPAC      | Short Moods and Feelings Questionnaire (SMFQ) | 11  | Child             | 5480 | 0.07             | 0.1 |         |
|               |        |                     |             |                                               | 13  | Child             | 5055 | 0.17             | 0.1 |         |
|               |        |                     |             |                                               | 14  | Child             | 4615 | 0.02             | 0.1 |         |
|               |        |                     |             |                                               | 17  | Child             | 3605 | 0.08             | 0.1 |         |
|               |        |                     |             |                                               | 18  | Child             | 3289 | 0.03             | 0.1 |         |
|               |        |                     |             |                                               | 19  | Child             | 2433 | 0.05             | 0.1 |         |
|               |        |                     |             |                                               | 10  | Parent            | 5571 | 0.04             | 0.1 |         |
|               |        |                     |             |                                               | 12  | Parent            | 5119 | 0.12             | 0.1 |         |
|               |        |                     |             |                                               | 13  | Parent            | 5031 | 0.07             | 0.1 |         |
| 17            | Parent | 3990                | 0.04        | 0.1                                           |     |                   |      |                  |     |         |

Note: Gen R= Generation R; NTR= Netherlands Twin Register; ALSPAC= Avon Longitudinal Study of Parents and Children; CBCL = Child Behaviour Checklist.

Three studies in samples other than TEDS have estimated SNP heritabilities for quantitative measures of childhood anxiety and depression, known as emotional problems, or internalising'. The average SNP heritability estimate from these studies is 10%. Although this is twice as high as the average in this study from the TEDS sample (5%), 10% SNP heritability is still well below half of the twin estimates of these phenotypes in the literature (40-60% in TEDS). Larger samples are needed to clarify this inconsistent and underpowered literature. For example, the study of pre-school internalising symptoms (Benke et al., 2014) had maximum 35% power with a sample of 2000 if true SNP heritability was half of the twin estimate they cite (50%), and a minimum of 10% power with a sample of 1000 and heritability of 20%. Moreover, the large ranges within the studies makes the estimates difficult to interpret.

Table 2: Descriptive statistics for the 12 TEDS anxiety and depression scales

|    | <b>Measure</b>          | <b>Sample size (twin pairs)</b> | <b>Number of items</b> | <b>Mean</b> | <b>Standard deviation</b> |
|----|-------------------------|---------------------------------|------------------------|-------------|---------------------------|
| 1  | Parent-rated SDQ at 7   | 5367                            | 5                      | 2.13        | 1.80                      |
| 2  | Teacher-rated SDQ at 7  | 4419                            | 5                      | 1.30        | 1.77                      |
| 3  | Parent-rated MFQ at 12  | 4486                            | 11                     | 1.13        | 2.24                      |
| 4  | Parent-rated SDQ at 12  | 4487                            | 5                      | 1.77        | 1.91                      |
| 5  | Self-rated MFQ at 12    | 4493                            | 11                     | 2.30        | 3.28                      |
| 6  | Self-rated SDQ at 12    | 4475                            | 5                      | 2.17        | 2.05                      |
| 7  | Teacher-rated SDQ at 12 | 3713                            | 5                      | 1.16        | 1.77                      |
| 8  | Parent-rated ARBQ at 16 | 3845                            | 19                     | 3.43        | 4.08                      |
| 9  | Parent-rated MFQ at 16  | 3844                            | 11                     | 0.96        | 2.28                      |
| 10 | Self-rated CASI at 16   | 3831                            | 18                     | 7.85        | 5.86                      |
| 11 | Self-rated MFQ at 16    | 3832                            | 13                     | 3.59        | 4.37                      |
| 12 | Self-rated SDQ at 16    | 3830                            | 5                      | 2.76        | 2.27                      |

Figure 1: Histograms of TEDS anxiety and depression scales

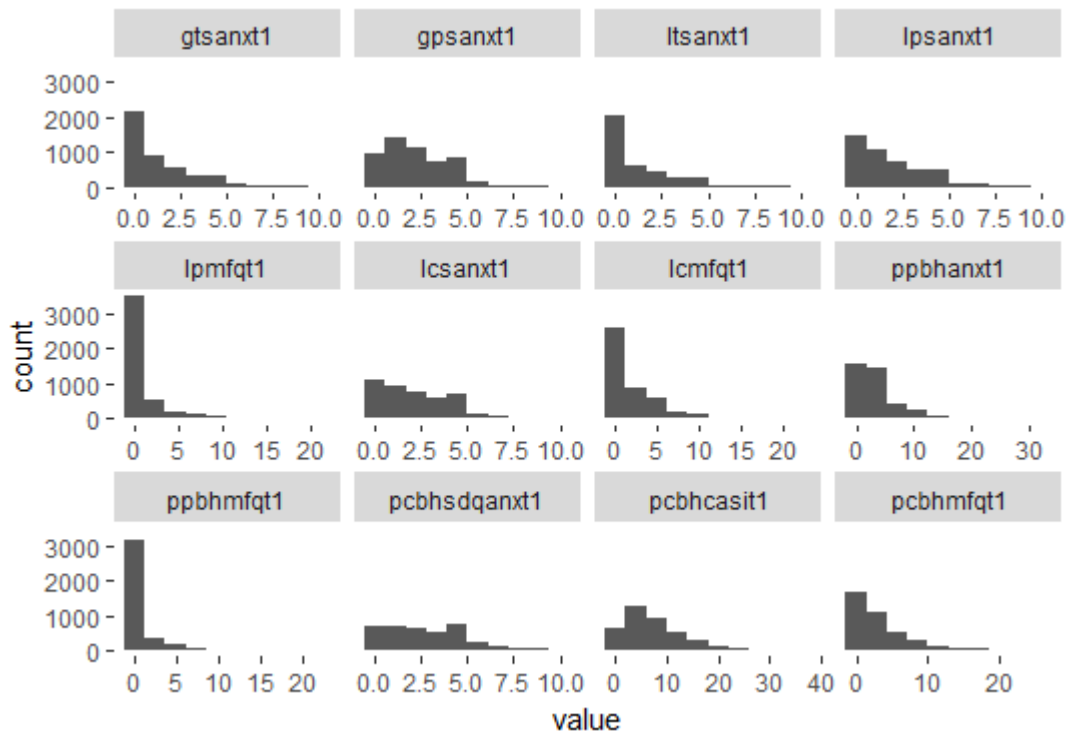

Note: 'gtsanxt1'= Teacher-rated SDQ at 7, 'gpsanxt1'= Parent-rated SDQ at 7, 'ltsanxt1'= Teacher-rated SDQ at 12, 'lpsanxt1'= Parent-rated SDQ at 12, 'lpmfqt1'= Parent-rated MFQ at 12, 'lcsanxt1'= Self-rated SDQ at 12, 'lcmfqt1'= Self-rated MFQ at 12, 'ppbhanxt1'= Parent-rated ARBQ at 16, 'ppbhmfqt1'= Parent-rated MFQ at 16, 'pcbhsdqanxt1'= Self-rated SDQ at 16, 'pcbhcasit1'= Self-rated CASI at 16, 'pcbhmfqt1'= Self-rated MFQ at 16.

Figure 2: Phenotypic correlations of the 12 anxiety and depression scales at ages 7, 12 and 16

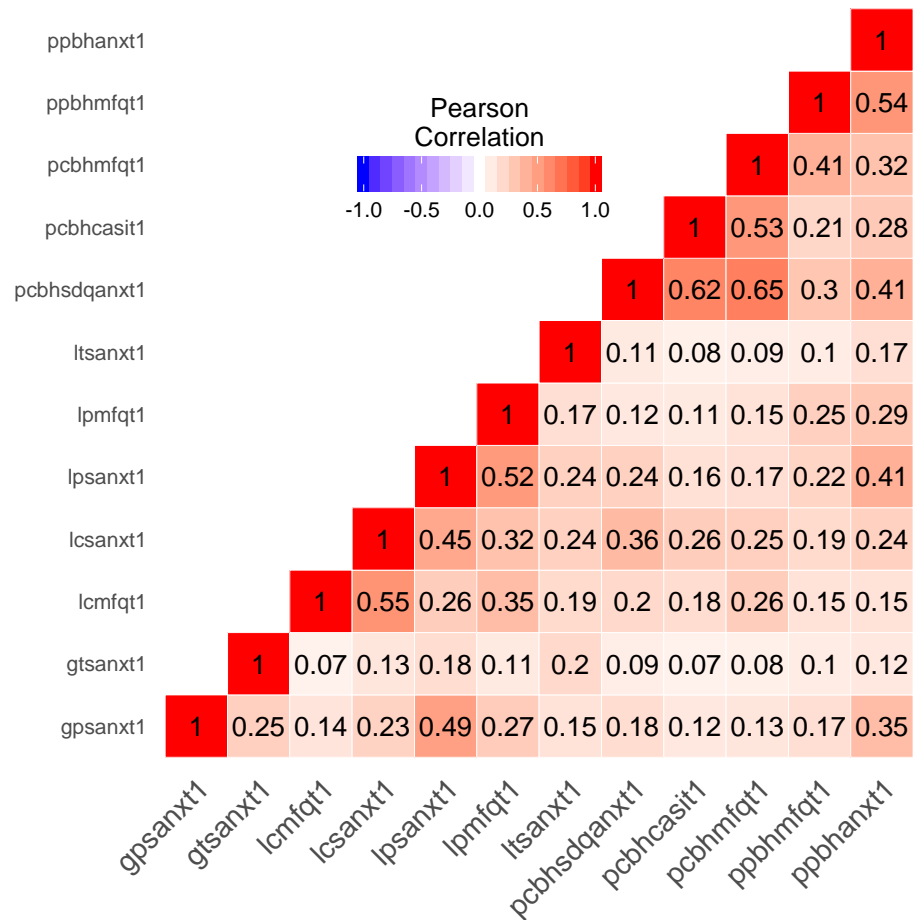

Note: correlations were calculated in R, before any data cleaning, and including only the people with genotype data and complete data for these 12 scales. See Note of Supplementary Figure 1 for variable names.

Figure 3: histograms of CFA- (left) and IRT-derived (right) stable emotional problems scores

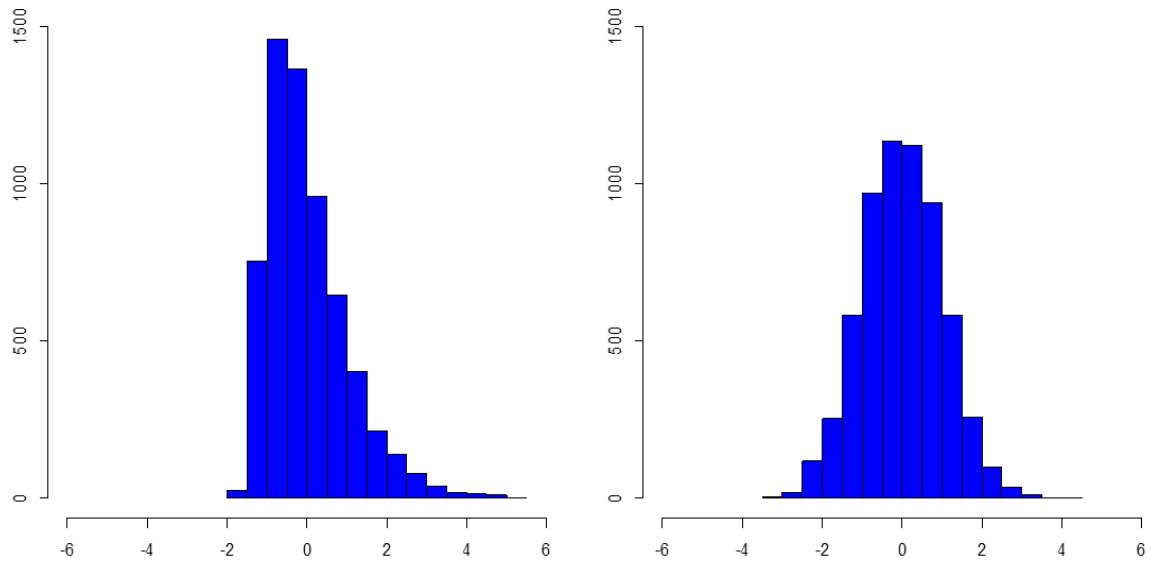

Note that the correlation between CFA and IRT factor scores is 0.92.

## CFA model fit and factor loadings

**Table 3: Twin correlations for emotional problems stable latent factor from CFA**

| Twin correlations |       |
|-------------------|-------|
| MZ                | 0.85  |
| DZ                | 0.489 |

**Table 4: Model Fit**

The single-factor model did not provide a good fit to the data. CFI and TLI were less than 0.9, suggesting worse fit than a restricted baseline model, and RMSEA was significantly greater than 0.05, suggesting poor fit. However, poor fit might be expected: it could reflect the lack of stability of anxiety across childhood (as indicated by the low correlations across our measures (heat map above), and the low stability in the literature), or it could reflect the higher than modelled associations within raters and within time-points.

| Fit indices for the CFA model of childhood emotional problems |      |
|---------------------------------------------------------------|------|
| CFI                                                           | 0.68 |
| TLI                                                           | 0.69 |
| RMSEA                                                         | 0.08 |

*Note: RMSEA = Root-Mean-Square Error of Approximation; CFI = Comparative Fit Index; TLI = Tucker-Lewis Index.*

**Table 5: Standardised Factor Loadings**

With regard to the CFA model, all measures load significantly onto the stable emotional problems factor. All measures loaded  $\geq 0.5$ , apart from the two teacher-rated measures, and self-rated MFQ at 12.

| Measure                 | Factor Loading | SE   |
|-------------------------|----------------|------|
| Parent-rated SDQ at 7   | 0.51           | 0.00 |
| Teacher-rated SDQ at 7  | 0.42           | 0.01 |
| Self-rated MFQ at 12    | 0.33           | 0.01 |
| Self-rated SDQ at 12    | 0.61           | 0.01 |
| Parent-rated SDQ at 12  | 0.50           | 0.01 |
| Parent-rated MFQ at 12  | 0.62           | 0.01 |
| Teacher-rated SDQ at 12 | 0.49           | 0.01 |
| Self-rated SDQ at 16    | 0.61           | 0.01 |

|                             |      |      |
|-----------------------------|------|------|
| Self-rated CASI at 16       | 0.56 | 0.01 |
| Self-rated MFQ at 16        | 0.73 | 0.01 |
| Parent-rated MFQ at 16      | 0.59 | 0.01 |
| Parent-rated ARBQ at age 16 | 0.68 | 0.01 |

**Table 6: Residual variances**

| Measure                     | Residual variance | SE   |
|-----------------------------|-------------------|------|
| Parent-rated SDQ at 7       | 0.74              | 0.00 |
| Teacher-rated SDQ at 7      | 0.82              | 0.01 |
| Self-rated MFQ at 12        | 0.89              | 0.01 |
| Self-rated SDQ at 12        | 0.63              | 0.01 |
| Parent-rated SDQ at 12      | 0.75              | 0.01 |
| Parent-rated MFQ at 12      | 0.61              | 0.01 |
| Teacher-rated SDQ at 12     | 0.76              | 0.01 |
| Self-rated SDQ at 16        | 0.63              | 0.01 |
| Self-rated CASI at 16       | 0.69              | 0.01 |
| Self-rated MFQ at 16        | 0.47              | 0.01 |
| Parent-rated MFQ at 16      | 0.65              | 0.01 |
| Parent-rated ARBQ at age 16 | 0.54              | 0.01 |



### Full genotyping information

DNA from 3665 individuals extracted from buccal cheek swabs was hybridized to AffymetrixGeneChip 6.0 SNP genotyping arrays using standard WTCCC2 experimental protocols. 4649 other individuals of European ancestry were genotyped on HumanOmniExpressExome-8v1.2 arrays at the Molecular Genetics Laboratories of the Medical Research Council Social, Genetic Developmental Psychiatry Centre, based on DNA extracted from saliva samples.

After initial quality control and genotype calling, the same quality control was conducted on the samples genotyped on the Affymetrix and Illumina platforms separately using PLINK (Purcell et al. 2007; Chang et al. 2015), R (GBIF.ORG n.d.), and vcftools (Danecek et al. 2011). Samples were removed based on call rate ( $<0.99$ ), suspected non-European ancestry, heterozygosity, array signal intensity, and relatedness. SNPs were excluded if minor allele frequency was  $<0.5\%$ , if more than 1% of genotype data were missing, or if the Hardy Weinberg p-value was lower than  $10^{-5}$ . Non-autosomal markers and indels were removed. Associations between the SNP and the platform, batch, or plate on which samples were genotyped were calculated; SNPs with p-values less than  $10^{-3}$  were excluded. A total sample of 6710 individuals remained after quality control – 3093 individuals and 525 859 SNPs genotyped on the Affymetrix platform and 3617 individuals and 600 034 SNPs genotyped on the Illumina platform.

Genotypes from the two platforms were separately imputed using the Haplotype Reference Consortium 5 and Minimac3 1.0.13 (Howie et al. 2012; Fuchsberger et al. 2015) before merging genotype data obtained from both arrays.

We performed principal component analysis on a subset of 42 859 common ( $MAF > 5\%$ ) autosomal HapMap3 SNPs (International HapMap 3 Consortium et al. 2010), after stringent pruning to remove markers in linkage disequilibrium ( $r^2 > 0.1$ ) and excluding high linkage disequilibrium genomic regions so as to ensure that only genome-wide effects were detected.

#### SNP heritability: supplementary methods

SNP heritabilities were estimated using genomic relatedness matrix restricted maximum likelihood (GREML), implemented in the Genome-wide Complex Trait Analysis (GCTA) program (Yang et al. 2011). This estimates genetic influence directly using genome-wide genotypes in large samples of unrelated individuals. First, genetic similarity for each pair of unrelated individuals across all genotyped or imputed genetic markers is calculated. Each pair's genetic similarity is then used to predict their phenotypic similarity. In the present study, one from each pair of individuals with pairwise identity-by-descent (IBD) of  $>0.025$  (third degree relatives) were removed, so that chance genetic similarity could be used as a random effect in a linear mixed model. Comparing a matrix of pairwise genomic similarity to a matrix of pairwise phenotypic similarity using a random-effects mixed linear model, the variance of a trait can be decomposed into genetic and residual components.

Table 7: Full twin and SNP heritability results:

| Measure                                | Twin h <sup>2</sup> | SNP h <sup>2</sup> | Twin SE | Twin 95% CI   | SNP SE | SNP 95% CI     | Twin N (pairs) | SNP N (indiv) | p (SNP h <sup>2</sup> ) |
|----------------------------------------|---------------------|--------------------|---------|---------------|--------|----------------|----------------|---------------|-------------------------|
| <b>Stable CFA score (simultaneous)</b> | 0.701               | n/a                | 0.047   | [0.608-0.792] | n/a    | n/a            | 6110           | n/a           | n/a                     |
| <b>Stable CFA score (extracted FS)</b> | 0.760               | 0.14               | 0.023   | [0.715-0.805] | 0.049  | [0.044-0.236]  | 6110           | 6002          | 0.002*                  |
| <b>Stable IRT score (simultaneous)</b> | 0.611               | n/a                | 0.043   | [0.527-0.695] | n/a    | n/a            | 6110           | n/a           | n/a                     |
| <b>Stable IRT score (extracted FS)</b> | 0.620               | 0.095              | 0.023   | [0.575-0.665] | 0.048  | [0.001-0.189]  | 6110           | 6001          | 0.025*                  |
| Parent-rated SDQ anxiety at 7          | 0.475               | 0.009              | 0.037   | [0.402-0.548] | 0.053  | [-0.095-0.113] | 5359           | 5272          | 0.438                   |
| Teacher-rated SDQ anxiety at 7         | 0.509               | 0.126              | 0.018   | [0.474-0.544] | 0.065  | [-0.001-0.253] | 4419           | 4336          | 0.023*                  |
| Self-rated MFQ at 12                   | 0.283               | 0.039              | 0.051   | [0.183-0.383] | 0.064  | [-0.086-0.164] | 4490           | 4414          | 0.27                    |
| Self-rated SDQ anxiety at 12           | 0.399               | 0.082              | 0.026   | [0.348-0.450] | 0.065  | [-0.045-0.209] | 4475           | 4396          | 0.106                   |
| Parent-rated SDQ anxiety at 12         | 0.531               | 0.022              | 0.041   | [0.451-0.611] | 0.062  | [-0.100-0.144] | 4482           | 4408          | 0.364                   |
| Parent-rated MFQ at 12                 | 0.478               | 0.029              | 0.038   | [0.404-0.552] | 0.063  | [-0.094-0.152] | 4482           | 4407          | 0.326                   |
| Teacher-rated SDQ anxiety at 12        | 0.426               | 0.029              | 0.023   | [0.381-0.471] | 0.077  | [-0.122-0.180] | 3695           | 3652          | 0.359                   |
| Self-rated SDQ anxiety at 16           | 0.428               | 0.094              | 0.018   | [0.393-0.463] | 0.075  | [-0.053-0.241] | 3822           | 3759          | 0.108                   |
| Self-rated CASI at 16                  | 0.445               | 0.069              | 0.019   | [0.408-0.482] | 0.076  | [-0.080-0.218] | 3824           | 3760          | 0.187                   |
| Self-rated MFQ at 16                   | 0.403               | 0                  | 0.024   | [0.356-0.450] | 0.074  | [-0.145-0.145] | 3824           | 3761          | 0.5                     |
| Parent-rated MFQ at 16                 | 0.567               | 0.099              | 0.031   | [0.506-0.628] | 0.073  | [-0.044-0.242] | 3838           | 3774          | 0.08                    |
| Parent-rated ARBQ at age 16            | 0.413               | 0                  | 0.039   | [0.337-0.489] | 0.066  | [-0.129-0.129] | 3840           | 3775          | 0.499                   |

Note: 'h<sup>2</sup>' = heritability; 'SE' = standard error; '95% CI' = 95% confidence intervals; 'p' = the p-value associated with the SNP heritability estimate, and whether p<0.05 (indicated with '\*'); 'FS' = stable emotional problems factor scores extracted from latent modelling; 'simultaneous' = simultaneous latent trait-twin modelling.

Figure 4: Twin and SNP heritability results for a simple mean approach to aggregating emotional problems measures, with sensitivity analyses to investigate rater effects

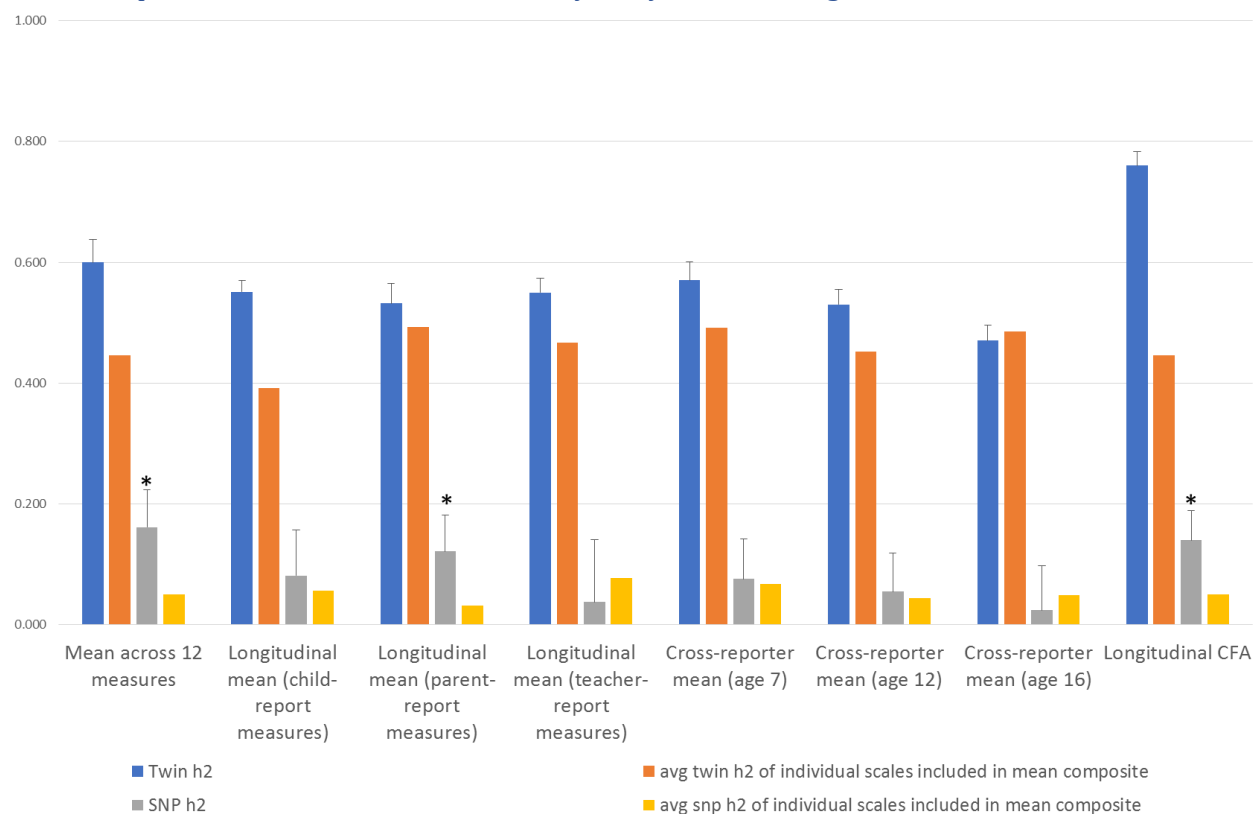

Note: means were calculated only for individuals with data present on at least half of the variables. Twin and SNP heritability results for the means (blue and grey) are compared to average heritabilities of the constituent individual measures (orange and yellow). ‘\*’ indicates a significant SNP heritability estimate.

Supplementary Figure 4 shows that the simpler approach of creating a mean of the 12 anxiety and depression measures yields similar results to a latent modelling approach (comparing the first and eighth sections of the plot). As such, the finding of higher twin and SNP heritabilities holds for even a crude composite measure that adds up common *and* measure-specific error (rather than latent modelling to remove error). This bolsters the argument that aggregating across time and across raters taps into a more heritable, core ‘trait’ aspect of emotional development.

To explore the whether the effect of extracting longitudinal stability increasing heritability remained when using single-rater composites, we created longitudinal means for child-, parent- and teacher-reports separately (sections 2-4 of the plot). Results suggest that this is the case. Twin estimates increased from ~45% to ~55%. SNP heritability point estimates increased for child- and parent-report longitudinal means (with longitudinal aggregation boosting SNP heritability of parent-report measures into statistical significance), but not for the teacher-report composite. Given the similar point estimates and large standard error intervals around SNP heritability estimates, it would be inappropriate to compare SNP heritability estimates.

To investigate the contribution of trans-situational variance (i.e. rater agreement on childhood emotional problems), we created means of anxiety and depression measures across reporters but at individual ages (sections 5-7 of the plot). Results suggest that combining cross-sectional measures across reporters increases twin and SNP heritability estimates at ages 7 and 12, but

not at 16. Again, standard errors for SNP heritability estimates are large, such that we cannot compare estimates for different composite measures, and we cannot say that aggregation across raters *significantly* increases SNP heritability. The heritability increase resulting from aggregating measures using a simple mean approach is weaker for SNP heritability than for twin estimates, but this is partly because the sample sizes for SNP heritability estimation were ~4000 (rather than over 6000 for latent modelling with maximum likelihood). The restriction of the mean composite approach to individuals with complete data is a disadvantage in comparison to the latent modelling approach. The finding that latent modelling is more powerful than simple approaches replicates evidence from the Netherlands Twin Register: a latent anxious depression phenotype was substantially more heritable than the scores observed at any age, but measure created by simply summing data from the different ages was considerably less heritable (Lubke et al. 2016).

Overall, results suggest that both the mean composite and latent factor across time and across reporters shows increased heritability as a result of tapping into longitudinally stable aspects of behaviour that are also agreed upon by different raters. Future research could more thoroughly and explicitly test the structure of age-, scale-, and rater-specific influences on emotional problems. For example, in the Trait-State-Occasion model, significant covariances between observed variable error terms indicates that trait stability is inflated by shared method variance cross waves.

[Investigation of the contribution of individuals with persistent emotional problems to the increased heritability of our stable phenotype.](#)

In studies of adults, recurrent depression is more severe and heritable than single episode depression. It follows that the heritability for stable childhood emotional problems could be higher because we are capturing the higher heritability of severe recurrent symptoms, rather than stability at any level of emotional symptoms. This is especially worth investigating given the high genetic correlation of our stable childhood emotional problems phenotype with adult depression.

To test this idea, we calculated how many of the 12 measures each individual was an outlier for. Outliers were defined as individuals with z-scores  $\geq 1.96$  (i.e. cutting off the top 1% of scores). We removed twin pairs for whom twin 1 or 2 was an outlier for  $>6$  of the 12 scales (i.e. removed 21 pairs). Then, we re-calculated the twin heritability of a single common factor (from CFA).

We found a lower twin heritability for stable emotional problems when excluding individuals with persistent problems (0.50 (se=0.05) vs 0.70 (se=0.05) for the CFA factor scores using all 6110 pairs). This suggests that a small number of young people with enduring severe emotional symptoms could be disproportionately contributing to the high heritability of stable emotional problems. However, 95% CIs for the two estimates just overlap (.40-.60 and .60-.80), so the difference is not statistically significant.

Adjusting the definition of outliers to  $z \geq 1.64$  (the top 5% of scores) led to the removal of 43 twin pairs for whom at least one twin was an outlier on more than half of the measures. The heritability estimate hardly decreased below 0.50 (0.49 (se=0.05)), but the upper 95% CI decreased to .57, such that the CIs no longer overlapped with the estimates from the full sample. Overall, there is no strong evidence that individuals with severe persistent symptoms are inflating heritability estimates.

Figures 5 and 6: Polygenic score results

The PRSice 2 plots below demonstrate that the  $R^2$  is not dramatically better at the best p-value threshold than at the others. This is indicative of reliable prediction for a polygenic trait.

Figure 4: Prediction of CFA scores using UK Biobank anxiety polygenic score

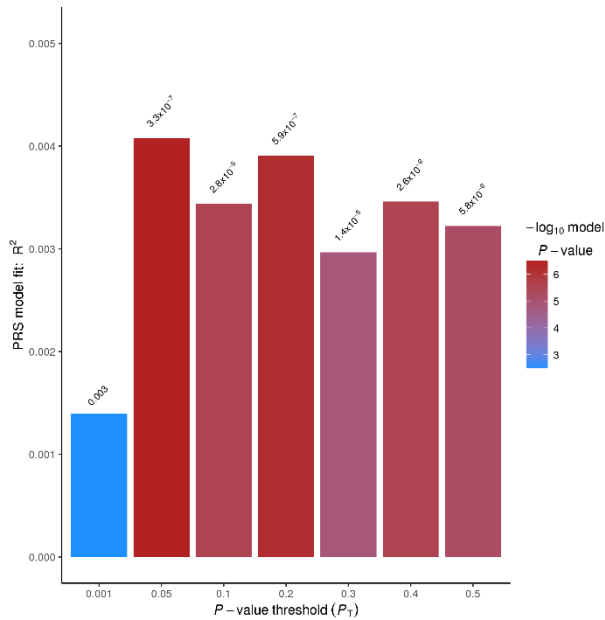

Figure 5: Prediction of IRT scores using UK Biobank anxiety polygenic score

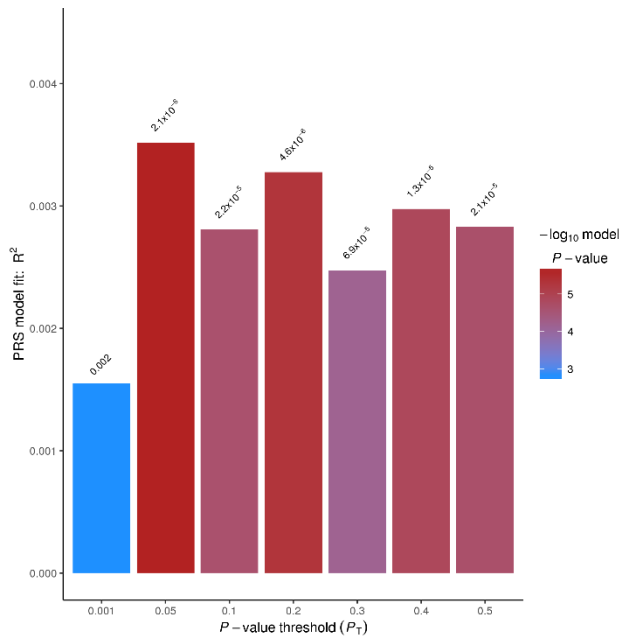

Table 8: variance explained by polygenic scores for MDD, derived from summary statistics for a subset of 10,000 variants in the PGC sample including 23&amp;Me.

|                         | <b>R<sup>2</sup></b> | <b>P-value</b> | <b>Empirical P-value</b> |
|-------------------------|----------------------|----------------|--------------------------|
| Stable CFA score        | 0.0041               | 0.0000         | 0.0001*                  |
| Stable IRT score        | 0.0031               | 0.0000         | 0.0002*                  |
| Parent-rated SDQ at 7   | 0.0006               | 0.0754         | 0.1268                   |
| Teacher-rated SDQ at 7  | 0.0023               | 0.0015         | 0.0026*                  |
| Self-rated MFQ at 12    | 0.0051               | 0.0000         | 0.0001*                  |
| Self-rated SDQ at 12    | 0.0024               | 0.0010         | 0.0020*                  |
| Parent-rated SDQ at 12  | 0.0009               | 0.0411         | 0.0743                   |
| Parent-rated MFQ at 12  | 0.0014               | 0.0113         | 0.0213*                  |
| Teacher-rated SDQ at 12 | 0.0005               | 0.1633         | 0.2582                   |
| Self-rated SDQ at 16    | 0.0022               | 0.0021         | 0.0038*                  |
| Self-rated CASI at 16   | 0.0034               | 0.0001         | 0.0005*                  |
| Self-rated MFQ at 16    | 0.0020               | 0.0042         | 0.0091*                  |
| Parent-rated MFQ at 16  | 0.0014               | 0.0202         | 0.0366*                  |
| Parent-rated ARBQ at 16 | 0.0021               | 0.0036         | 0.0067*                  |

Note: '\*' indicates target TEDS phenotypes that were significantly predicted by polygenic scores at the more stringent empirical p-value thresholds.



Figures 7 and 8: Genome-wide association results

No significant SNPs were identified. There are no SNPs that exceed a  $-\log_{10}$  p-value of more than 6. This was expected, given the relatively small sample (6110), and the lack of associations in previous, similarly powered studies of emotional problems (e.g. Benke et al, 2014 meta-analysis of preschool emotional problems, N=4596).

IRT score GWAS: FUMA plot:

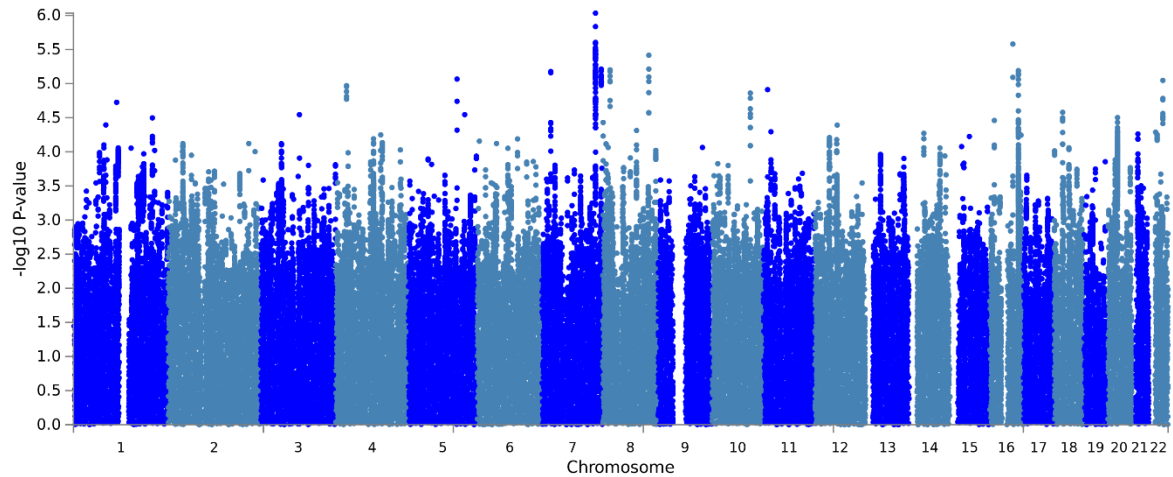

CFA score GWAS: FUMA plot:

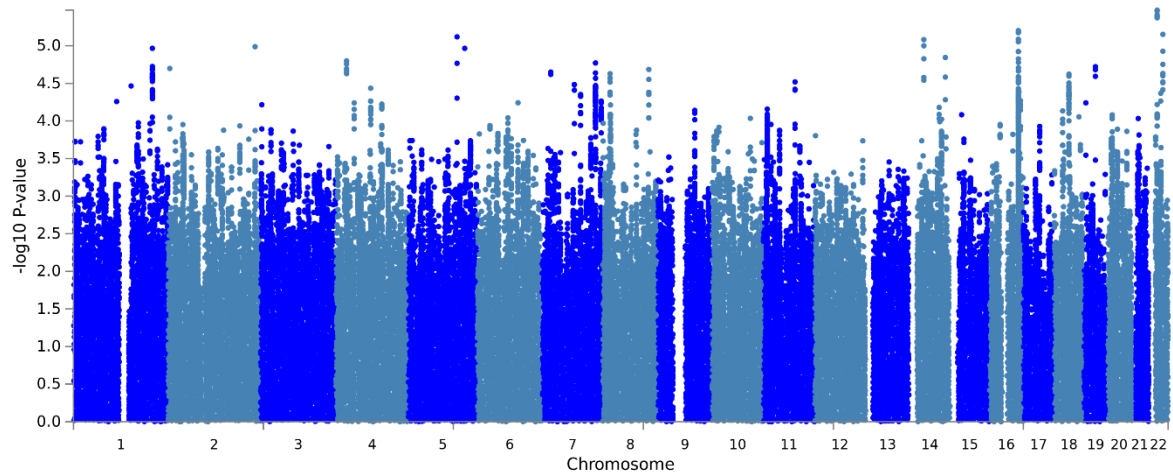

Table 9: Genetic correlations between stable emotional problems (from CFA) and psychiatric traits, obtained using LD Score regression.

| Trait                                            | PMID     | rg    | se   | z     | p        | h2_obs | h2_obs_se |
|--------------------------------------------------|----------|-------|------|-------|----------|--------|-----------|
| Depressive symptoms                              | 27089181 | 0.64  | 0.19 | 3.37  | 0.0008** | 0.05   | 0         |
| Adult depression (PGC) †                         |          | 0.48  | 0.14 | 3.35  | 0.0008** | 0      | 0         |
| Adult anxiety (UK Biobank) †                     |          | 0.45  | 0.15 | 2.92  | 0.0035** | 0.11   | 0.01      |
| Subjective well being                            | 27089181 | -0.36 | 0.15 | -2.36 | 0.0182*  | 0.02   | 0         |
| Major depressive disorder                        | 22472876 | 0.37  | 0.2  | 1.9   | 0.0574   | 0.18   | 0.03      |
| Schizophrenia                                    | 25056061 | 0.16  | 0.09 | 1.8   | 0.0718   | 0.45   | 0.02      |
| PGC cross-disorder analysis                      | 23453885 | 0.21  | 0.14 | 1.49  | 0.1368   | 0.18   | 0.01      |
| Attention deficit hyperactivity disorder (GC)    | 27663945 | 0.34  | 0.3  | 1.14  | 0.2528   | 0.08   | 0.03      |
| Attention deficit hyperactivity disorder (No GC) | 27663945 | 0.34  | 0.3  | 1.14  | 0.2538   | 0.08   | 0.03      |
| Attention deficit hyperactivity disorder         | 20732625 | -0.27 | 0.3  | -0.9  | 0.3677   | 0.22   | 0.1       |
| Autism spectrum disorder                         | 0        | -0.06 | 0.15 | -0.39 | 0.6972   | 0.46   | 0.05      |
| Bipolar disorder                                 | 21926972 | 0.02  | 0.14 | 0.14  | 0.8857   | 0.45   | 0.04      |
| Anorexia Nervosa                                 | 24514567 | -0.01 | 0.13 | -0.06 | 0.9528   | 0.4    | 0.04      |

Note: Pairs of traits are ordered according to the p-value of their genetic correlation. \* = significant at  $p < 0.05$ , \*\* = significant at  $p < 0.00385$  i.e.  $(0.05/13)$  to correct for multiple tests; † = genetic correlation analysis performed separately (using LDSR) because phenotype was *not* in LD Hub.

The genetic correlations between our CFA-derived stable scores, and case-control depression, depressive symptoms, case-control generalised anxiety, and wellbeing, are significant at  $p < 0.05$ . The negative genetic correlation with wellbeing did not remain significant at the more stringent threshold ( $p < 0.00385$ ). Genetic correlations have many possible interpretations other than true biological pleiotropy (Martin et al. 2017). For example, the relationship between adult depression and childhood stable emotional problems could be mediated by shared genetic risk with low levels of well-being. It has been suggested that the genetic correlation between MDD and depressive symptoms in the population could be accounted for by shared genetic risk with low levels of subjective well-being (Direk et al. 2017). Another issue is that nosological issues involving heterogeneity, comorbidity and misclassification might inflate phenotypic and genetic correlations.

Full authors list: Major Depressive Disorder Working Group of the Psychiatric Genomics Consortium

Naomi R Wray\* 1, 2  
Stephan Ripke\* 3, 4, 5  
Manuel Mattheisen\* 6, 7, 8, 9  
Maciej Trzaskowski\* 1  
Enda M Byrne 1  
Abdel Abdellaoui 10  
Mark J Adams 11  
Esben Agerbo 9, 12, 13  
Tracy M Air 14  
Till F M Andlauer 15, 16  
Silviu-Alin Bacanu 17  
Marie Bækvad-Hansen 9, 18  
Aartjan T F Beekman 19  
Tim B Bigdeli 17, 20  
Elisabeth B Binder 15, 21  
Douglas H R Blackwood 11  
Julien Bryois 22  
Henriette N Buttenschøn 8, 9, 23  
Jonas Bybjerg-Grauholm 9, 18  
Na Cai 24, 25  
Enrique Castelao 26  
Jane Hvarregaard Christensen 7, 8, 9  
Toni-Kim Clarke 11  
Jonathan R I Coleman 27  
Lucía Colodro-Conde 28  
Baptiste Couvy-Duchesne 29, 30  
Nick Craddock 31  
Gregory E Crawford 32, 33  
Gail Davies 34  
Ian J Deary 34  
Franziska Degenhardt 35, 36  
Eske M Derks 28  
Nese Direk 37, 38  
Conor V Dolan 10  
Erin C Dunn 39, 40, 41  
Thalia C Eley 27  
Valentina Escott-Price 42  
Farnush Farhadi Hassan Kiadeh 43  
Hilary K Finucane 44, 45  
Andreas J Forstner 35, 36, 46, 47  
Josef Frank 48  
Héléna A Gaspar 27  
Michael Gill 49  
Fernando S Goes 50  
Scott D Gordon 51  
Jakob Grove 7, 8, 9, 52  
Lynsey S Hall 11, 53  
Christine Sørholm Hansen 9, 18  
Thomas F Hansen 54, 55, 56  
Stefan Herms 35, 36, 47  
Ian B Hickie 57  
Per Hoffmann 35, 36, 47  
Georg Homuth 58  
Carsten Horn 59  
Jouke-Jan Hottenga 10  
David M Hougaard 9, 18  
Marcus Ising 60  
Rick Jansen 19, 19  
Eric Jorgenson 61  
James A Knowles 62  
Isaac S Kohane 63, 64, 65  
Julia Kraft 4  
Warren W. Kretschmar 66  
Jesper Krogh 67  
Zoltán Kutalik 68, 69  
Yihan Li 66  
Penelope A Lind 28  
Donald J MacIntyre 70, 71  
Dean F MacKinnon 50  
Robert M Maier 2  
Wolfgang Maier 72  
Jonathan Marchini 73  
Hamdi Mbarek 10  
Patrick McGrath 74  
Peter McGuffin 27  
Sarah E Medland 28  
Divya Mehta 2, 75  
Christel M Middeldorp 10, 76, 77  
Evelin Mihailov 78  
Yuri Milaneschi 19, 19  
Lili Milani 78  
Francis M Mondimore 50  
Grant W Montgomery 1  
Sara Mostafavi 79, 80  
Niamh Mullins 27  
Matthias Nauck 81, 82  
Bernard Ng 80  
Michel G Nivard 10  
Dale R Nyholt 83  
Paul F O'Reilly 27  
Hogni Oskarsson 84  
Michael J Owen 85  
Jodie N Painter 28  
Carsten Bøcker Pedersen 9, 12, 13  
Marianne Giørtz Pedersen 9, 12, 13  
Roseann E. Peterson 17, 86  
Erik Pettersson 22  
Wouter J Peyrot 19  
Giorgio Pistis 26  
Danielle Posthuma 87, 88  
Jorge A Quiroz 89  
Per Qvist 7, 8, 9  
John P Rice 90  
Brien P. Riley 17  
Margarita Rivera 27, 91  
Saira Saeed Mirza 37  
Robert Schoevers 92  
Eva C Schulte 93, 94  
Ling Shen 61  
Jianxin Shi 95  
Stanley I Shyn 96  
Engilbert Sigurdsson 97  
Grant C B Sinnamon 98  
Johannes H Smit 19  
Daniel J Smith 99  
Hreinn Stefansson 100  
Stacy Steinberg 100  
Fabian Streit 48  
Jana Strohmaier 48  
Katherine E Tansey 101  
Henning Teismann 102  
Alexander Teumer 103  
Wesley Thompson 9, 55, 104, 105  
Pippa A Thomson 106  
Thorgerir E Thorgerirsson 100  
Matthew Traylor 107  
Jens Treutlein 48  
Vassily Trubetskoy 4

André G Uitterlinden 108  
Daniel Umbricht 109  
Sandra Van der Auwera 110  
Albert M van Hemert 111  
Alexander Viktorin 22  
Peter M Visscher 1, 2  
Yunpeng Wang 9, 55, 105  
Bradley T. Webb 112  
Shantel Marie Weinsheimer  
9, 55  
Jürgen Wellmann 102  
Gonneke Willemsen 10  
Stephanie H Witt 48  
Yang Wu 1  
Hualin S Xi 113  
Jian Yang 2, 114  
Futao Zhang 1  
Volker Arolt 115  
Bernhard T Baune 14  
Klaus Berger 102  
Dorret I Boomsma 10  
Sven Cichon 35, 47, 116,  
117  
Udo Dannlowski 115  
EJC de Geus 10, 118  
J Raymond DePaulo 50  
Enrico Domenici 119  
Katharina Domschke 120  
Tõnu Esko 5, 78  
Hans J Grabe 110  
Steven P Hamilton 121  
Caroline Hayward 122  
Andrew C Heath 90  
Kenneth S Kendler 17  
Stefan Kloiber 60, 123, 124  
Glyn Lewis 125  
Qingqin S Li 126  
Susanne Lucae 60  
Pamela AF Madden 90  
Patrik K Magnusson 22  
Nicholas G Martin 51  
Andrew M McIntosh 11, 34  
Andres Metspalu 78, 127  
Ole Mors 9, 128  
Preben Bo Mortensen 8, 9,  
12, 13  
Bertram Müller-Myhsok 15,  
16, 129  
Merete Nordentoft 9, 130  
Markus M Nöthen 35, 36  
Michael C O'Donovan 85  
Sara A Paciga 131  
Nancy L Pedersen 22  
Brenda WJH Penninx 19  
Roy H Perlis 39, 132  
David J Porteous 106  
James B Potash 133  
Martin Preisig 26  
Marcella Rietschel 48  
Catherine Schaefer 61  
Thomas G Schulze 48,  
94, 134, 135, 136  
Jordan W Smoller 39,  
40, 41  
Kari Stefansson 100,  
137  
Henning Tiemeier 37,  
138, 139  
Rudolf Uher 140  
Henry Völzke 103  
Myrna M Weissman 74,  
141  
Thomas Werge 9, 55,  
142  
Cathryn M Lewis\* 27,  
143  
Douglas F Levinson\*  
144  
Gerome Breen\* 27, 145  
Anders D Børghlum\* 7, 8,  
9  
Patrick F Sullivan\* 22,  
146, 147,

- 1, Institute for Molecular Bioscience, The University of Queensland, Brisbane, QLD, AU
- 2, Queensland Brain Institute, The University of Queensland, Brisbane, QLD, AU
- 3, Analytic and Translational Genetics Unit, Massachusetts General Hospital, Boston, MA, US
- 4, Department of Psychiatry and Psychotherapy, Universitätsmedizin Berlin Campus Charité Mitte, Berlin, DE
- 5, Medical and Population Genetics, Broad Institute, Cambridge, MA, US
- 6, Centre for Psychiatry Research, Department of Clinical Neuroscience, Karolinska Institutet, Stockholm, SE
- 7, Department of Biomedicine, Aarhus University, Aarhus, DK
- 8, iSEQ, Centre for Integrative Sequencing, Aarhus University, Aarhus, DK
- 9, iPSYCH, The Lundbeck Foundation Initiative for Integrative Psychiatric Research, DK
- 10, Dept of Biological Psychology & EMGO+ Institute for Health and Care Research, Vrije Universiteit Amsterdam, Amsterdam, NL
- 11, Division of Psychiatry, University of Edinburgh, Edinburgh, GB
- 12, Centre for Integrated Register-based Research, Aarhus University, Aarhus, DK
- 13, National Centre for Register-Based Research, Aarhus University, Aarhus, DK
- 14, Discipline of Psychiatry, University of Adelaide, Adelaide, SA, AU
- 15, Department of Translational Research in Psychiatry, Max Planck Institute of Psychiatry, Munich, DE
- 16, Munich Cluster for Systems Neurology (SyNergy), Munich, DE
- 17, Department of Psychiatry, Virginia Commonwealth University, Richmond, VA, US
- 18, Center for Neonatal Screening, Department for Congenital Disorders, Statens Serum Institut, Copenhagen, DK
- 19, Department of Psychiatry, Vrije Universiteit Medical Center and GGZ inGeest, Amsterdam, NL
- 20, Virginia Institute for Psychiatric and Behavior Genetics, Richmond, VA, US
- 21, Department of Psychiatry and Behavioral Sciences, Emory University School of Medicine, Atlanta, GA, US
- 22, Department of Medical Epidemiology and Biostatistics, Karolinska Institutet, Stockholm, SE
- 23, Department of Clinical Medicine, Translational Neuropsychiatry Unit, Aarhus University, Aarhus, DK
- 24, Human Genetics, Wellcome Trust Sanger Institute, Cambridge, GB
- 25, Statistical genomics and systems genetics, European Bioinformatics Institute (EMBL-EBI), Cambridge, GB
- 26, Department of Psychiatry, University Hospital of Lausanne, Prilly, Vaud, CH
- 27, MRC Social Genetic and Developmental Psychiatry Centre, King's College London, London, GB
- 28, Genetics and Computational Biology, QIMR Berghofer Medical Research Institute, Herston, QLD, AU
- 29, Centre for Advanced Imaging, The University of Queensland, Saint Lucia, QLD, AU
- 30, Queensland Brain Institute, The University of Queensland, Saint Lucia, QLD, AU
- 31, Psychological Medicine, Cardiff University, Cardiff, GB
- 32, Center for Genomic and Computational Biology, Duke University, Durham, NC, US
- 33, Department of Pediatrics, Division of Medical Genetics, Duke University, Durham, NC, US
- 34, Centre for Cognitive Ageing and Cognitive Epidemiology, University of Edinburgh, Edinburgh, GB
- 35, Institute of Human Genetics, University of Bonn, Bonn, DE
- 36, Life&Brain Center, Department of Genomics, University of Bonn, Bonn, DE
- 37, Epidemiology, Erasmus MC, Rotterdam, Zuid-Holland, NL
- 38, Psychiatry, Dokuz Eylul University School Of Medicine, Izmir, TR

- 39, Department of Psychiatry, Massachusetts General Hospital, Boston, MA, US
- 40, Psychiatric and Neurodevelopmental Genetics Unit (PNGU), Massachusetts General Hospital, Boston, MA, US
- 41, Stanley Center for Psychiatric Research, Broad Institute, Cambridge, MA, US
- 42, Neuroscience and Mental Health, Cardiff University, Cardiff, GB
- 43, Bioinformatics, University of British Columbia, Vancouver, BC, CA
- 44, Department of Epidemiology, Harvard T.H. Chan School of Public Health, Boston, MA, US
- 45, Department of Mathematics, Massachusetts Institute of Technology, Cambridge, MA, US
- 46, Department of Psychiatry (UPK), University of Basel, Basel, CH
- 47, Human Genomics Research Group, Department of Biomedicine, University of Basel, Basel, CH
- 48, Department of Genetic Epidemiology in Psychiatry, Central Institute of Mental Health, Medical Faculty Mannheim, Heidelberg University, Mannheim, Baden-Württemberg, DE
- 49, Department of Psychiatry, Trinity College Dublin, Dublin, IE
- 50, Psychiatry & Behavioral Sciences, Johns Hopkins University, Baltimore, MD, US
- 51, Genetics and Computational Biology, QIMR Berghofer Medical Research Institute, Brisbane, QLD, AU
- 52, Bioinformatics Research Centre, Aarhus University, Aarhus, DK
- 53, Institute of Genetic Medicine, Newcastle University, Newcastle upon Tyne, GB
- 54, Danish Headache Centre, Department of Neurology, Rigshospitalet, Glostrup, DK
- 55, Institute of Biological Psychiatry, Mental Health Center Sct. Hans, Mental Health Services Capital Region of Denmark, Copenhagen, DK
- 56, iPSYCH, The Lundbeck Foundation Initiative for Psychiatric Research, Copenhagen, DK
- 57, Brain and Mind Centre, University of Sydney, Sydney, NSW, AU
- 58, Interfaculty Institute for Genetics and Functional Genomics, Department of Functional Genomics, University Medicine and Ernst Moritz Arndt University Greifswald, Greifswald, Mecklenburg-Vorpommern, DE
- 59, Roche Pharmaceutical Research and Early Development, Pharmaceutical Sciences, Roche Innovation Center Basel, F. Hoffmann-La Roche Ltd, Basel, CH
- 60, Max Planck Institute of Psychiatry, Munich, DE
- 61, Division of Research, Kaiser Permanente Northern California, Oakland, CA, US
- 62, Psychiatry & The Behavioral Sciences, University of Southern California, Los Angeles, CA, US
- 63, Department of Biomedical Informatics, Harvard Medical School, Boston, MA, US
- 64, Department of Medicine, Brigham and Women's Hospital, Boston, MA, US
- 65, Informatics Program, Boston Children's Hospital, Boston, MA, US
- 66, Wellcome Trust Centre for Human Genetics, University of Oxford, Oxford, GB
- 67, Department of Endocrinology at Herlev University Hospital, University of Copenhagen, Copenhagen, DK
- 68, Institute of Social and Preventive Medicine (IUMSP), University Hospital of Lausanne, Lausanne, VD, CH
- 69, Swiss Institute of Bioinformatics, Lausanne, VD, CH
- 70, Division of Psychiatry, Centre for Clinical Brain Sciences, University of Edinburgh, Edinburgh, GB
- 71, Mental Health, NHS 24, Glasgow, GB
- 72, Department of Psychiatry and Psychotherapy, University of Bonn, Bonn, DE
- 73, Statistics, University of Oxford, Oxford, GB
- 74, Psychiatry, Columbia University College of Physicians and Surgeons, New York, NY, US
- 75, School of Psychology and Counseling, Queensland University of Technology, Brisbane, QLD, AU



- 76, Child and Youth Mental Health Service, Children's Health Queensland Hospital and Health Service, South Brisbane, QLD, AU
- 77, Child Health Research Centre, University of Queensland, Brisbane, QLD, AU
- 78, Estonian Genome Center, University of Tartu, Tartu, EE
- 79, Medical Genetics, University of British Columbia, Vancouver, BC, CA
- 80, Statistics, University of British Columbia, Vancouver, BC, CA
- 81, DZHK (German Centre for Cardiovascular Research), Partner Site Greifswald, University Medicine, University Medicine Greifswald, Greifswald, Mecklenburg-Vorpommern, DE
- 82, Institute of Clinical Chemistry and Laboratory Medicine, University Medicine Greifswald, Greifswald, Mecklenburg-Vorpommern, DE
- 83, Institute of Health and Biomedical Innovation, Queensland University of Technology, Brisbane, QLD, AU
- 84, Humus, Reykjavik, IS
- 85, MRC Centre for Neuropsychiatric Genetics and Genomics, Cardiff University, Cardiff, GB
- 86, Virginia Institute for Psychiatric & Behavioral Genetics, Virginia Commonwealth University, Richmond, VA, US
- 87, Clinical Genetics, Vrije Universiteit Medical Center, Amsterdam, NL
- 88, Complex Trait Genetics, Vrije Universiteit Amsterdam, Amsterdam, NL
- 89, Solid Biosciences, Boston, MA, US
- 90, Department of Psychiatry, Washington University in Saint Louis School of Medicine, Saint Louis, MO, US
- 91, Department of Biochemistry and Molecular Biology II, Institute of Neurosciences, Center for Biomedical Research, University of Granada, Granada, ES
- 92, Department of Psychiatry, University of Groningen, University Medical Center Groningen, Groningen, NL
- 93, Department of Psychiatry and Psychotherapy, Medical Center of the University of Munich, Campus Innenstadt, Munich, DE
- 94, Institute of Psychiatric Phenomics and Genomics (IPPG), Medical Center of the University of Munich, Campus Innenstadt, Munich, DE
- 95, Division of Cancer Epidemiology and Genetics, National Cancer Institute, Bethesda, MD, US
- 96, Behavioral Health Services, Kaiser Permanente Washington, Seattle, WA, US
- 97, Faculty of Medicine, Department of Psychiatry, University of Iceland, Reykjavik, IS
- 98, School of Medicine and Dentistry, James Cook University, Townsville, QLD, AU
- 99, Institute of Health and Wellbeing, University of Glasgow, Glasgow, GB
- 100, deCODE Genetics / Amgen, Reykjavik, IS
- 101, College of Biomedical and Life Sciences, Cardiff University, Cardiff, GB
- 102, Institute of Epidemiology and Social Medicine, University of Münster, Münster, Nordrhein-Westfalen, DE
- 103, Institute for Community Medicine, University Medicine Greifswald, Greifswald, Mecklenburg-Vorpommern, DE
- 104, Department of Psychiatry, University of California, San Diego, San Diego, CA, US
- 105, KG Jebsen Centre for Psychosis Research, Norway Division of Mental Health and Addiction, Oslo University Hospital, Oslo, NO
- 106, Medical Genetics Section, CGEM, IGMM, University of Edinburgh, Edinburgh, GB
- 107, Clinical Neurosciences, University of Cambridge, Cambridge, GB
- 108, Internal Medicine, Erasmus MC, Rotterdam, Zuid-Holland, NL
- 109, Roche Pharmaceutical Research and Early Development, Neuroscience, Ophthalmology and Rare Diseases Discovery & Translational Medicine Area, Roche Innovation Center Basel, F. Hoffmann-La Roche Ltd, Basel, CH

- 110, Department of Psychiatry and Psychotherapy, University Medicine Greifswald, Greifswald, Mecklenburg-Vorpommern, DE
- 111, Department of Psychiatry, Leiden University Medical Center, Leiden, NL
- 112, Virginia Institute of Psychiatric & Behavioral Genetics, Virginia Commonwealth University, Richmond, VA, US
- 113, Computational Sciences Center of Emphasis, Pfizer Global Research and Development, Cambridge, MA, US
- 114, Institute for Molecular Bioscience; Queensland Brain Institute, The University of Queensland, Brisbane, QLD, AU
- 115, Department of Psychiatry, University of Münster, Münster, Nordrhein-Westfalen, DE
- 116, Institute of Medical Genetics and Pathology, University Hospital Basel, University of Basel, Basel, CH
- 117, Institute of Neuroscience and Medicine (INM-1), Research Center Juelich, Juelich, DE
- 118, Amsterdam Public Health Institute, Vrije Universiteit Medical Center, Amsterdam, NL
- 119, Centre for Integrative Biology, Università degli Studi di Trento, Trento, Trentino-Alto Adige, IT
- 120, Department of Psychiatry and Psychotherapy, Medical Center, University of Freiburg, Faculty of Medicine, University of Freiburg, Freiburg, DE
- 121, Psychiatry, Kaiser Permanente Northern California, San Francisco, CA, US
- 122, Medical Research Council Human Genetics Unit, Institute of Genetics and Molecular Medicine, University of Edinburgh, Edinburgh, GB
- 123, Department of Psychiatry, University of Toronto, Toronto, ON, CA
- 124, Centre for Addiction and Mental Health, Toronto, ON, CA
- 125, Division of Psychiatry, University College London, London, GB
- 126, Neuroscience Therapeutic Area, Janssen Research and Development, LLC, Titusville, NJ, US
- 127, Institute of Molecular and Cell Biology, University of Tartu, Tartu, EE
- 128, Psychosis Research Unit, Aarhus University Hospital, Risskov, Aarhus, DK
- 129, University of Liverpool, Liverpool, GB
- 130, Mental Health Center Copenhagen, Copenhagen University Hospital, Copenhagen, DK
- 131, Human Genetics and Computational Biomedicine, Pfizer Global Research and Development, Groton, CT, US
- 132, Psychiatry, Harvard Medical School, Boston, MA, US
- 133, Psychiatry, University of Iowa, Iowa City, IA, US
- 134, Department of Psychiatry and Behavioral Sciences, Johns Hopkins University, Baltimore, MD, US
- 135, Department of Psychiatry and Psychotherapy, University Medical Center Göttingen, Goettingen, Niedersachsen, DE
- 136, Human Genetics Branch, NIMH Division of Intramural Research Programs, Bethesda, MD, US
- 137, Faculty of Medicine, University of Iceland, Reykjavik, IS
- 138, Child and Adolescent Psychiatry, Erasmus MC, Rotterdam, Zuid-Holland, NL
- 139, Psychiatry, Erasmus MC, Rotterdam, Zuid-Holland, NL
- 140, Psychiatry, Dalhousie University, Halifax, NS, CA
- 141, Division of Epidemiology, New York State Psychiatric Institute, New York, NY, US
- 142, Department of Clinical Medicine, University of Copenhagen, Copenhagen, DK
- 143, Department of Medical & Molecular Genetics, King's College London, London, GB
- 144, Psychiatry & Behavioral Sciences, Stanford University, Stanford, CA, US
- 145, NIHR BRC for Mental Health, King's College London, London, GB
- 146, Genetics, University of North Carolina at Chapel Hill, Chapel Hill, NC, US
- 147, Psychiatry, University of North Carolina at Chapel Hill, Chapel Hill, NC, US



### LD Hub acknowledgements

We gratefully acknowledge all the studies and databases that made GWAS summary data available: **ADIPOGen** (Adiponectin genetics consortium), **C4D** (Coronary Artery Disease Genetics Consortium), **CARDIoGRAM** (Coronary ARtery Disease Genome wide Replication and Meta-analysis), **CKDGen** (Chronic Kidney Disease Genetics consortium), **dbGAP** (database of Genotypes and Phenotypes), **DIAGRAM** (DIAbetes Genetics Replication And Meta-analysis), **ENIGMA** (Enhancing Neuro Imaging Genetics through Meta Analysis), **EAGLE** (EARly Genetics & Lifecourse Epidemiology Eczema Consortium, excluding 23andMe), **EGG** (Early Growth Genetics Consortium), **GABRIEL** (A Multidisciplinary Study to Identify the Genetic and Environmental Causes of Asthma in the European Community), **GCAN** (Genetic Consortium for Anorexia Nervosa), **GEFOS** (Genetic Factors for OSteoporosis Consortium), **GIANT** (Genetic Investigation of ANthropometric Traits), **GIS** (Genetics of Iron Status consortium

), **GLGC** (Global Lipids Genetics Consortium), **GPC** (Genetics of Personality Consortium), **GUGC** (Global Urate and Gout consortium), **HaemGen** (haematological and platelet traits genetics consortium), **HRgene** (Heart Rate consortium), **IIBDGC** (International Inflammatory Bowel Disease Genetics Consortium), **ILCCO** (International Lung Cancer Consortium), **IMSGC** (International Multiple Sclerosis Genetic Consortium), **MAGIC** (Meta-Analyses of Glucose and Insulin-related traits Consortium), **MESA** (Multi-Ethnic Study of Atherosclerosis), **PGC** (Psychiatric Genomics Consortium), **Project MinE** consortium, **ReproGen** (Reproductive Genetics Consortium), **SSGAC** (Social Science Genetics Association Consortium) and **TAG** (Tobacco and Genetics Consortium), **TRICL** (Transdisciplinary Research in Cancer of the Lung consortium), **UK Biobank**.

We gratefully acknowledge the contributions of Alkes Price (the systemic lupus erythematosus GWAS and primary biliary cirrhosis GWAS) and Johannes Kettunen (lipids metabolites GWAS).

## Bibliography

Chang, C.C., Chow, C.C., Tellier, L.C., Vattikuti, S., Purcell, S.M. and Lee, J.J. 2015. Second-generation PLINK: rising to the challenge of larger and richer datasets. *GigaScience* 4, p. 7.

Danecek, P., Auton, A., Abecasis, G., Albers, C.A., Banks, E., DePristo, M.A., Handsaker, R.E., Lunter, G., Marth, G.T., Sherry, S.T., McVean, G., Durbin, R. and 1000 Genomes Project Analysis Group 2011. The variant call format and VCFtools. *Bioinformatics* 27(15), pp. 2156–2158.

Direk, N., Williams, S., Smith, J.A., Ripke, S., Sullivan, P.F., et al. 2017. An Analysis of Two Genome-wide Association Meta-analyses Identifies a New Locus for Broad Depression Phenotype. *Biological Psychiatry* 82(5), pp. 322–329.

Fuchsberger, C., Abecasis, G.R. and Hinds, D.A. 2015. minimac2: faster genotype imputation. *Bioinformatics* 31(5), pp. 782–784.

GBIF.ORG R: a language and environment for statistical computing [Online]. Available at: <http://www.gbif.org/resource/81287> [Accessed: 8 May 2017].

Howie, B., Fuchsberger, C., Stephens, M., Marchini, J. and Abecasis, G.R. 2012. Fast and accurate genotype imputation in genome-wide association studies through pre-phasing. *Nature Genetics* 44(8), pp. 955–959.

International HapMap 3 Consortium, Altshuler, D.M., Gibbs, R.A., Peltonen, L., McEwen, J.E., et al. 2010. Integrating common and rare genetic variation in diverse human populations. *Nature* 467(7311), pp. 52–58.

Lubke, G.H., Miller, P.J., Verhulst, B., Bartels, M., van Beijsterveldt, T., Willemsen, G., Boomsma, D.I. and Middeldorp, C.M. 2016. A powerful phenotype for gene-finding studies derived from trajectory analyses of symptoms of anxiety and depression between age seven and 18. *American Journal of Medical Genetics. Part B, Neuropsychiatric Genetics* 171(7), pp. 948–957.

Martin, J., Taylor, M.J. and Lichtenstein, P. 2017. Assessing the evidence for shared genetic risks across psychiatric disorders and traits. *Psychological Medicine*, pp. 1–16.

Purcell, S., Neale, B., Todd-Brown, K., Thomas, L., Ferreira, M.A.R., Bender, D., Maller, J., Sklar, P., de Bakker, P.I.W., Daly, M.J. and Sham, P.C. 2007. PLINK: a tool set for whole-genome association and population-based linkage analyses. *American Journal of Human Genetics* 81(3), pp. 559–575.
